# Supplementary material
Source: Springer Nature journal article supplement (https://www.springermedizin.de/resource/supplementary/12884_2014_1093_MOESM2_ESM.pdf/9458902)
Supplement: MOESM2 [file 9458902]

# Training Sample

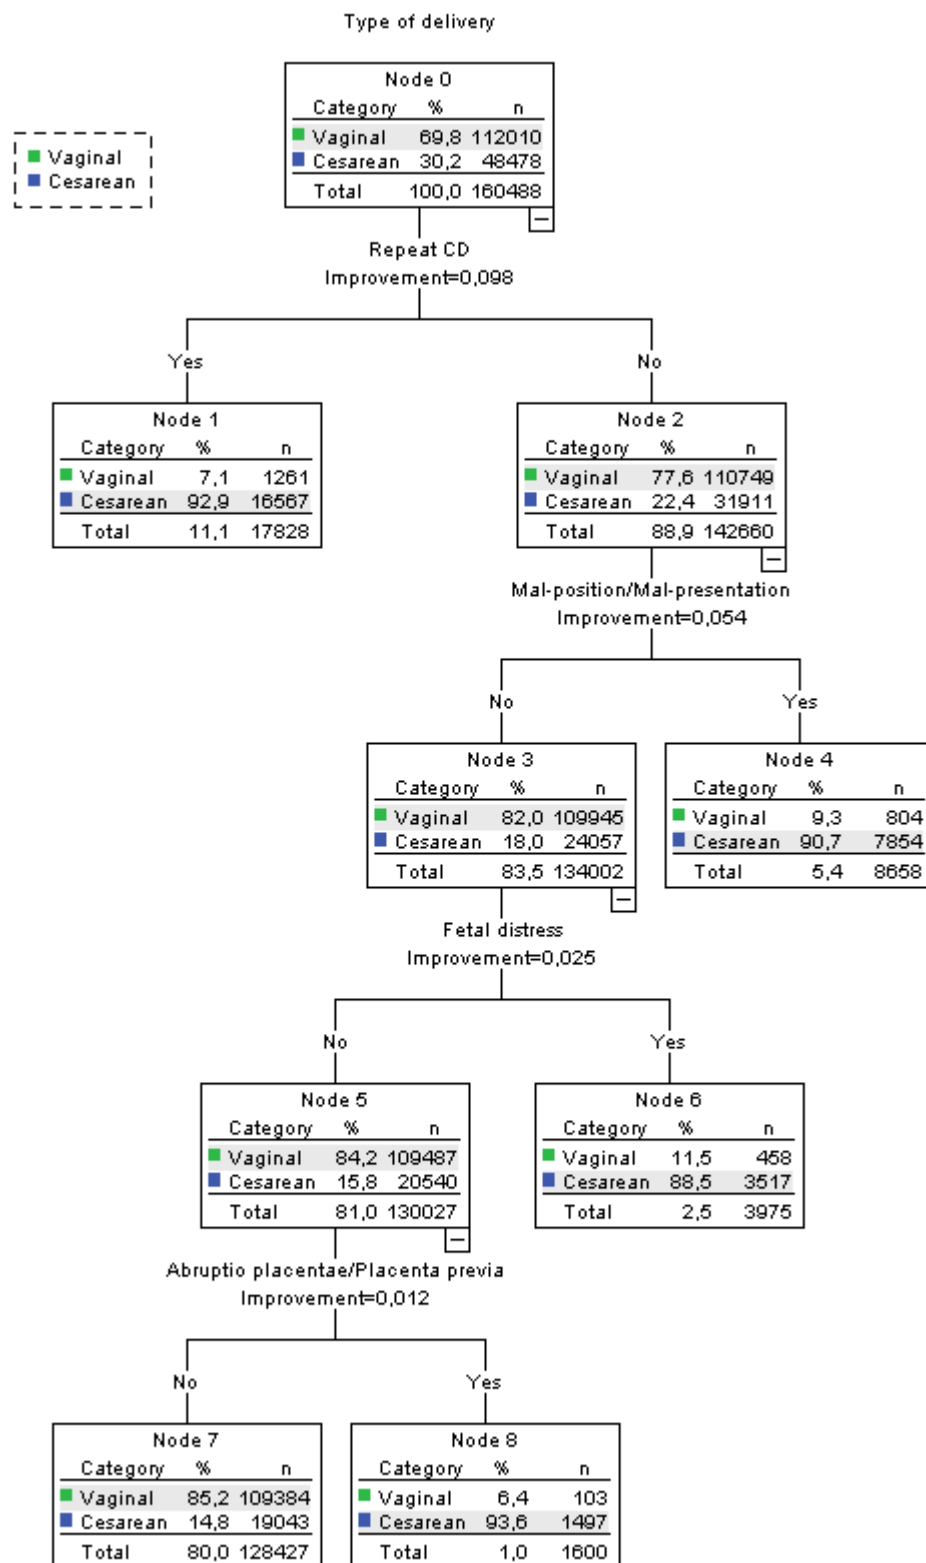

# Test Sample

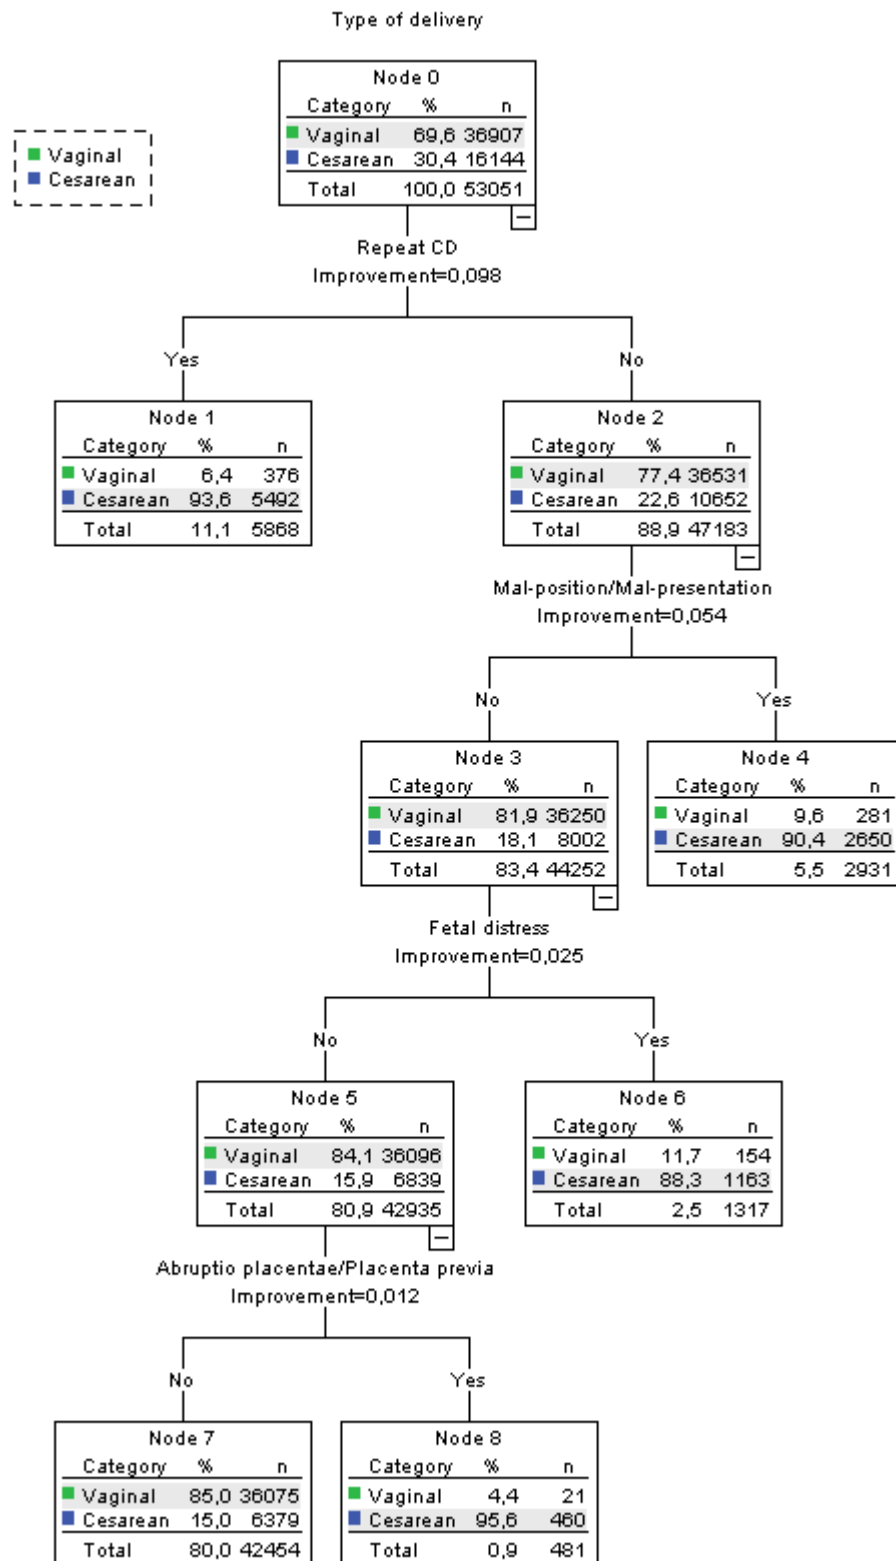

**Classification**

| Sample   | Observed           | Predicted |            |                 |
|----------|--------------------|-----------|------------|-----------------|
|          |                    | 0 Vaginal | 1 Cesarean | Percent Correct |
| Training | 0 Vaginal          | 109384    | 2626       | 97,7%           |
|          | 1 Cesarean         | 19043     | 29435      | 60,7%           |
|          | Overall Percentage | 80,0%     | 20,0%      | 86,5%           |
| Test     | 0 Vaginal          | 36075     | 832        | 97,7%           |
|          | 1 Cesarean         | 6379      | 9765       | 60,5%           |
|          | Overall Percentage | 80,0%     | 20,0%      | 86,4%           |

Growing Method: CRT

Dependent Variable: csec\_3 Type of delivery
